# Supplementary material
Source: PubMed Central journal article supplement (PMC3119722)

# Supplemental Figure 1.

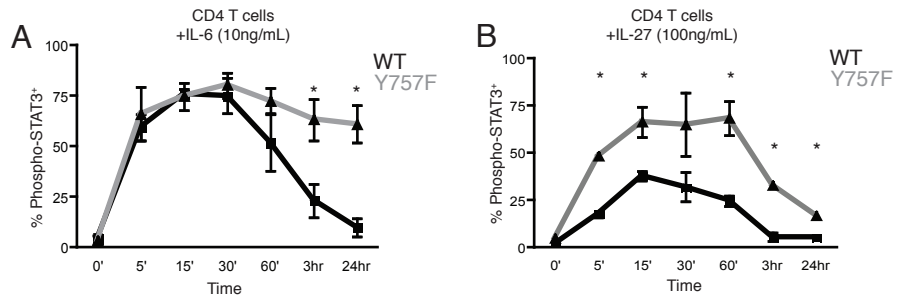

Supplement: NIHMS292771-supplement-1.pdf [file NIHMS292771-supplement-1.pdf]
